# Supplementary material for: Changes in Viewer Engagement and Accessibility of Popular Vaping Videos on TikTok: A 12-Month Prospective Study
Source: Int J Environ Res Public Health. 2022 Jan 20;19(3):1141. doi: 10.3390/ijerph19031141 (PMC8834819; doi:10.3390/ijerph19031141)
Supplement: Supplementary file 1 [file ijerph-19-01141-s001.zip › ijerph-1543739-supplementary.pdf]

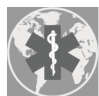

## Supplementary Material

### Supplementary Materials

**Table S1.** Hashtag-Based Keywords and Corresponding Views (in Millions) at Baseline.

| Hashtag-Based Keywords | Views (in Millions) in November 2020 |
|------------------------|--------------------------------------|
| #juulgang              | 587.7                                |
| #nicotine              | 312.5                                |
| #puffbar               | 348.2                                |
| #vape                  | 2300                                 |
| #vapelite              | 242.6                                |
| #vapenation            | 328.9                                |
| #vapeshop              | 283.2                                |
| #vapetricks            | 868.6                                |
| #vaping                | 279.6                                |

**Table S2.** Comparisons of Metadata, Sentiment and Themes in Remaining Available Videos at the Baseline and 9- and 12-Months.

| Variable                | Baseline Sample<br>( <i>n</i> = 802) | 9-Month Sample<br>( <i>n</i> = 562) | 12-Month Sample<br>( <i>n</i> = 511) |
|-------------------------|--------------------------------------|-------------------------------------|--------------------------------------|
| <b>Metrics</b>          |                                      |                                     |                                      |
| Total Media Views       | 2022787 (SD = 4300294)               | 2061940 (SD = 2877891)              | 2059617 (SD = 2886899)               |
| Total Media Likes       | 286766 (SD = 566620)                 | 297504 (SD = 549551)                | 299356 (SD = 565157)                 |
| <b>Sentiment</b>        |                                      |                                     |                                      |
| Positive                | 510 (63.6%)                          | 296 (52.7%)                         | 299 (58.5%)                          |
| Negative                | 188 (23.4%)                          | 80 (14.2%)                          | 82 (16.0%)                           |
| Neutral                 | 104 (13.0%)                          | 129 (22.9%)                         | 130 (25.4%)                          |
| <b>Themes</b>           |                                      |                                     |                                      |
| Comedy and Joke         | 420 (52.4%)                          | 274 (48.8%)                         | 279 (54.6%)                          |
| Lifestyle Acceptability | 270 (34.8%)                          | 165 (29.4%)                         | 169 (33.1%)                          |
| Marketing               | 229 (28.6%)                          | 113 (20.1%)                         | 115 (22.5%)                          |
| Vaping Tricks           | 159 (19.8%)                          | 105 (18.7%)                         | 105 (20.5%)                          |
| Nicotine and Addiction  | 159 (19.8%)                          | 105 (18.7%)                         | 106 (20.7%)                          |
| Creativity and Tips     | 129 (16.1%)                          | 82 (14.6%)                          | 83 (16.2%)                           |
| Warning                 | 85 (10.6%)                           | 64 (11.4%)                          | 64 (12.5%)                           |

**Table S3.** Comparisons of Metadata, Sentiment and Themes in Removed Videos at the Baseline and 9- and 12-Months.

| Variable                | Baseline Sample<br>( <i>n</i> = 802) | 9-Month Sample<br>( <i>n</i> = 240) | 12-Month Sample<br>( <i>n</i> = 291) |
|-------------------------|--------------------------------------|-------------------------------------|--------------------------------------|
| <b>Metrics</b>          |                                      |                                     |                                      |
| Total Media Views       | 2022787 (SD = 4300294)               | 1771496 (SD = 2922273)              | 1745926 (SD = 2633559)               |
| Total Media Likes       | 286766 (SD = 566620)                 | 263155 (SD = 548481)                | 252306 (SD = 504006)                 |
| <b>Sentiment</b>        |                                      |                                     |                                      |
| Positive                | 510 (63.6%)                          | 179 (74.6%)                         | 213 (73.2%)                          |
| Negative                | 188 (23.4%)                          | 18 (7.5%)                           | 23 (7.9%)                            |
| Neutral                 | 104 (13.0%)                          | 45 (18.7%)                          | 55 (18.9%)                           |
| <b>Themes</b>           |                                      |                                     |                                      |
| Comedy and Joke         | 420 (52.4%)                          | 111 (46.3%)                         | 142 (48.8%)                          |
| Lifestyle Acceptability | 270 (34.8%)                          | 101 (42.1%)                         | 114 (39.2%)                          |
| Marketing               | 229 (28.6%)                          | 92 (38.3%)                          | 115 (39.5%)                          |
| Vaping Tricks           | 159 (19.8%)                          | 51 (21.3%)                          | 55 (18.9%)                           |
| Nicotine and Addiction  | 159 (19.8%)                          | 41 (17.1%)                          | 53 (18.2%)                           |
| Creativity and Tips     | 129 (16.1%)                          | 32 (13.3%)                          | 47 (16.2%)                           |
| Warning                 | 85 (10.6%)                           | 16 (6.7%)                           | 22 (7.7%)                            |
